# Supplementary material for: Ionic liquids as solvents of polar and non-polar solutes: affinity and coordination
Source: Royal Society of Chemistry journal article supplement (doi:10.1039/c5cp01774b), 2015-01-01
Supplement: c5cp01774b1.pdf [file c5cp01774b1.pdf]

# Ionic liquids as solvents of polar and non-polar solutes: affinity and coordination. Supplementary Information.

Elixabete Rezabal<sup>\*,†</sup> and Thomas Schäfer<sup>\*,‡,§</sup>

*Laboratoire de Chimie Moléculaire, Department of Chemistry, Ecole Polytechnique and CNRS, 91128 Palaiseau Cedex, France, POLYMAT, University of the Basque Country UPV/EHU 20018 Donostia-San Sebastián, Spain, and IKERBASQUE, Basque Foundation for Science, Bilbao, Spain*

E-mail: elixabete.rezabal@polytechnique.edu; thomas.schafer@ehu.es

## Technical parameters of ab initio molecular dynamics (AIMD) calculations

The initial geometries for the AIMDs were extracted from classical MD simulations carried out employing the GROMACS<sup>1-4</sup> package. A cubic box of 82 Å length containing 3002 [MIM][Cl] ion pairs and a H<sub>2</sub>O or CO<sub>2</sub> molecule was generated and temperature increased using velocity rescaling, first with a timestep of 0.02 fs during 100ps and afterwards with 0.2 fs during 50 ps. Posteriorly, it was equilibrated in NPT ensemble at 1 bar and 425 K to converge the system towards the experimental density of 1.174 g/cm at 425K.<sup>5</sup> A timestep of 0.5 fs was used, during 1 ns (Parrinello isostat, Nose-Hoover thermostat).

---

\*To whom correspondence should be addressed

<sup>†</sup>Laboratoire de Chimie Moléculaire, Department of Chemistry, Ecole Polytechnique and CNRS, 91128 Palaiseau Cedex, France

<sup>‡</sup>POLYMAT, University of the Basque Country UPV/EHU 20018 Donostia-San Sebastián, Spain

<sup>§</sup>IKERBASQUE, Basque Foundation for Science, Bilbao, Spain

A box of 18 [MIM][Cl] ion pairs with the solute in the center was extracted from the classical MD equilibrated system and simulated by applying periodic boundary conditions with a box length of 15x15x15 Å. Ab initio molecular dynamics (AIMD) simulations were based on the Car-Parrinello method<sup>6</sup> and were performed with the CPMD code.<sup>7</sup> The general gradient-corrected density functional BLYP with empirical dispersion correction<sup>8</sup> was chosen and the Kohn-Sham orbitals were expanded in a plane wave basis with a kinetic energy cutoff of 70 Ry. A fictional electron mass of 400 a.u. and a time step of 4.0 a.u. were used throughout all CPMD simulations. The temperature was set to 425K, initially controlled by velocity rescaling and after by Nose-Hoover chain thermostats.<sup>9-11</sup> The equilibration period was carried with Nose-Hoover chain thermostats coupled to each ionic degree of freedom, and subsequently the system was relaxed applying thermostats. Finally, the system was simulated in NVT ensemble, reaching a production time of around 33ps.

## Geometrical parameters of CO<sub>2</sub>-([MIM][Cl])<sub>n</sub> and H<sub>2</sub>O-([MIM][Cl])<sub>n</sub> (n=1,2) complexes

Table 1: Geometrical parameters of H<sub>2</sub>O-[MIM][Cl] isomers, at BLYP-D/TZVP theory level, angle in degrees and distances in Å.

|           |          | H <sub>w</sub> -O-H <sub>w</sub> | H <sub>w</sub> -O | H <sub>w</sub> -Cl | H <sub>r</sub> -Cl | H <sub>r</sub> -O | H <sub>met</sub> -O |       |
|-----------|----------|----------------------------------|-------------------|--------------------|--------------------|-------------------|---------------------|-------|
| Gas phase | <b>1</b> | 104.7                            | 1.004             | 0.972              | 2.113              | 2.818             | 2.172               | 2.439 |
|           | <b>2</b> | 103.9                            | 1.003             | 0.972              | 2.122              | 2.183             | 2.887               | 2.355 |
|           | <b>3</b> | 103.9                            | 1.004             | 0.972              | 2.167              | 2.167             | 2.672               | 2.150 |
| IL phase  | <b>1</b> | 104.1                            | 1.002             | 0.975              | 2.119              | 3.262             | 2.228               | 2.646 |
|           | <b>2</b> | 103.9                            | 0.996             | 0.975              | 2.175              | 2.440             | 2.791               | 3.299 |
|           | <b>3</b> | 103.7                            | 0.998             | 0.975              | 2.146              | 2.492             | 2.782               | 2.366 |

Table 2: Geometrical parameters of  $\text{H}_2\text{O}([\text{MIM}][\text{Cl}])_2$  complexes, at BLYP-D/TZVP theory level, angle in degrees and distances in Å.

|                    | $\text{H}_w\text{-O-H}_w$ | $\text{H}_w\text{-O}$ | $\text{H}_w\text{-Cl}$ | $\text{H}_r\text{-Cl}$ | $\text{H}_r\text{-O}$ | $\text{H}_{Met}\text{-O}$ |       |       |       |       |
|--------------------|---------------------------|-----------------------|------------------------|------------------------|-----------------------|---------------------------|-------|-------|-------|-------|
| Gas phase <b>1</b> | 104.5                     | 0.991                 | 2.259                  | 2.311                  | 2.273                 | 2.351                     | 3.387 | 3.077 | 2.475 | 2.512 |
| <b>2</b>           | 104.5                     | 0.990                 | 2.311                  | 2.258                  | 2.271                 | 2.354                     | 3.380 | 3.085 | 2.475 | 2.515 |
| <b>3</b>           | 103.4                     | 0.990                 | 2.218                  | 2.266                  | 2.410                 |                           | 2.642 | 3.273 | 2.253 | 2.497 |
| <b>4</b>           | 104.1                     | 0.995                 | 2.309                  | 2.232                  | 2.385                 |                           | 3.362 | 3.183 | 2.535 | 2.444 |
| <b>5</b>           | 104.8                     | 0.994                 | 2.258                  | 2.351                  | 2.428                 |                           | 3.521 | 3.526 | 2.572 | 2.599 |
| IL phase <b>1</b>  | 105.8                     | 0.993                 | 2.223                  | 2.269                  | 2.542                 |                           | 2.919 | 2.804 | 2.899 | 3.835 |
| <b>2</b>           | 103.5                     | 0.998                 | 2.150                  |                        | 2.794                 | 2.497                     | 2.489 |       | 2.423 |       |
| <b>3</b>           | 106.0                     | 0.993                 | 2.315                  | 2.217                  | 2.509                 |                           | 3.179 | 3.073 | 3.088 |       |
| <b>4</b>           | 106.0                     | 0.993                 | 2.217                  | 2.315                  | 2.509                 |                           | 3.179 | 3.073 | 3.088 |       |
| <b>5</b>           | 104.9                     | 0.993                 | 2.210                  | 2.296                  | 2.503                 |                           | 3.095 | 3.097 | 2.994 | 3.006 |

Table 3: Geometrical parameters of CO<sub>2</sub>-[MIM][Cl] isomers, at BLYP-D/TZVP theory level, angle in degrees and distances in Å.

|           |          | O-C-O | C-O   | C-Cl  | H <sub>r</sub> -Cl | H <sub>r</sub> -C | H <sub>r</sub> -O | H <sub>Met</sub> -O |              |
|-----------|----------|-------|-------|-------|--------------------|-------------------|-------------------|---------------------|--------------|
| Gas phase | <b>1</b> | 174.4 | 1.170 | 1.181 | 3.136              | 2.707             | 3.100             | 2.357               | 2.803        |
|           | <b>2</b> | 173.7 | 1.171 | 1.181 | 3.119              | 2.038             | 3.375             | 2.889               | 2.716        |
|           | <b>3</b> | 173.6 | 1.176 | 1.175 | 3.143              | 2.149             | 3.540             | 3.767               | 2.608(3.060) |
| IL phase  | <b>1</b> | 175.1 | 1.173 | 1.176 | 3.197              | 2.960             | 3.099             | 2.448               | 3.070        |
|           | <b>2</b> | 175.9 | 1.173 | 1.175 | 3.242              | 2.305             | 3.300             | 2.741               | 2.943        |
|           | <b>3</b> | 176.0 | 1.174 | 1.174 | 3.276              | 2.558             | 3.463             | 3.372               | 2.963(3.216) |

Table 4: Geometrical parameters of  $\text{CO}_2\text{-}([\text{MIM}][\text{Cl}])_2$  isomers, at BLYP-D/TZVP theory level, angle in degrees and distances in Å.

|                    | O-C-O | C-O   | C-Cl  | H <sub>r</sub> -Cl | H <sub>r</sub> -C | H <sub>r</sub> -O | H <sub>Met</sub> -O |       |       |       |       |
|--------------------|-------|-------|-------|--------------------|-------------------|-------------------|---------------------|-------|-------|-------|-------|
| Gas phase <b>1</b> | 175.2 | 1.174 | 3.292 | 2.464              | 2.459             | 2.989             | 2.994               | 2.584 | 2.590 | 2.497 | 2.493 |
| <b>2</b>           | 175.1 | 1.173 | 1.177 | 3.189              | 2.335             | 2.263             | 2.918               | 2.927 |       | 2.611 |       |
| <b>3</b>           | 173.6 | 1.175 | 1.176 | 3.134              | 2.234             | 2.428             | 3.759               | 3.251 |       | 2.701 |       |
| <b>4</b>           | 175.1 | 1.177 | 1.173 | 3.188              | 2.262             | 2.335             | 2.918               | 2.925 |       | 2.608 |       |
| <b>5</b>           | 171.6 | 1.177 | 1.176 | 3.045              | 2.258             |                   |                     | 3.092 | 2.542 | 2.559 |       |
| IL phase <b>1</b>  | 176.6 | 1.174 | 1.174 | 3.299              | 2.329             | 2.345             | 2.954               | 3.200 |       | 3.092 |       |
| <b>2</b>           | 174.9 | 1.175 | 1.174 | 3.176              | 2.347             | 2.488             | 3.463               | 3.254 |       | 2.720 |       |
| <b>3</b>           | 175.7 | 1.175 | 1.173 | 3.220              | 2.406             | 2.417             | 2.998               | 3.245 |       | 2.669 | 3.074 |
| <b>4</b>           | 175.1 | 1.174 | 1.174 | 3.201              | 2.455             |                   |                     | 3.879 |       | 3.089 |       |
| <b>5</b>           | 176.5 | 1.174 | 1.174 | 3.305              | 2.455             |                   |                     |       |       | 2.794 | 2.804 |

## Topological analysis

The NCI method is based on the relationship of the reduced density gradient ( $s$ ) and the electron density ( $\rho$ ):<sup>12</sup>

$$s = \frac{1}{2(3\pi^2)^{\frac{1}{3}}} \frac{|\nabla\rho|}{\rho^{\frac{4}{3}}} \quad (1)$$

The representation of  $s$  versus  $\rho$  shows characteristic peaks at low density values in the presence of non-covalent interactions due to the annihilation of the density gradient at these points. On one hand, the strength of the interaction is derived from the density values of the low-gradient spikes. Dispersion interactions usually appear at very low density values ( $\rho < 0.01$  a.u.), whereas stronger hydrogen-bonds appear at higher density values ( $0.01 < \rho < 0.05$  a.u.). On the other hand, the sign of the second eigenvalue ( $\lambda_2$ ) of the electron-density Hessian matrix is used to distinguish between bonded ( $\lambda_2 < 0$ ) and non-bonded ( $\lambda_2 > 0$ ) interactions. Since the sign of the second eigenvalue [ $\text{sign}(\lambda_2)$ ] is indicative for the type of interaction, the gradient is plotted against the product of the  $\text{sign}(\lambda_2)$  and the electron density function. A very important tool is the visualization of the gradient isosurface in real space (3D plots). Again, the value of the  $\text{sign}(\lambda_2)\rho$  is used to colour the different isosurfaces. Usually, a RGB (red-blue-green) scale is used; red isosurfaces indicate repulsive interactions, blue stands for attractive interactions and green for very weak van der Waals-type interactions.

## NCI analysis of $\text{H}_2\text{O}([\text{MIM}][\text{Cl}])$ and $\text{CO}_2([\text{MIM}][\text{Cl}])$ complexes

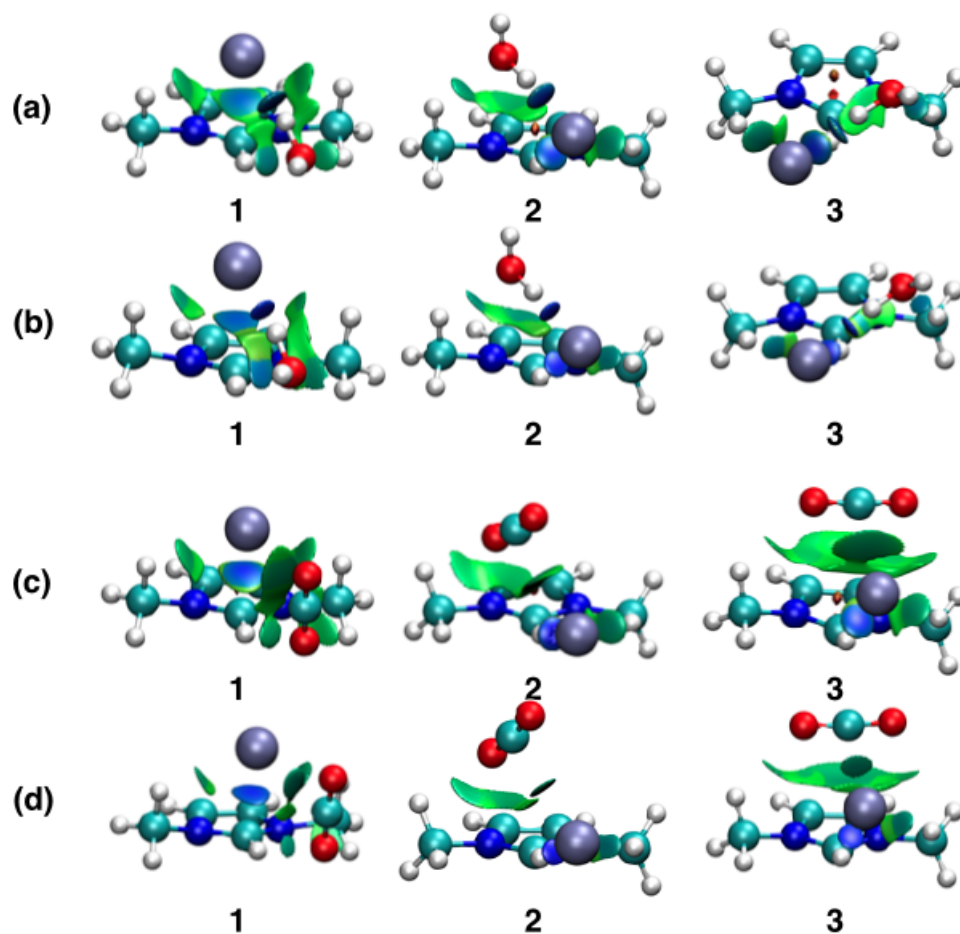

Figure 1: 3D plot of  $\text{sign}(\lambda_2)\rho$  ( $s=5.0$  a.u.) for the different  $\text{H}_2\text{O}([\text{MIM}][\text{Cl}])$  ((a) and (b)) and  $\text{CO}_2([\text{MIM}][\text{Cl}])$  ((c) and (d)) isomers using wave function ((a) and (c)) and promolecular ((b) and (d)) densities for the NCI analysis.

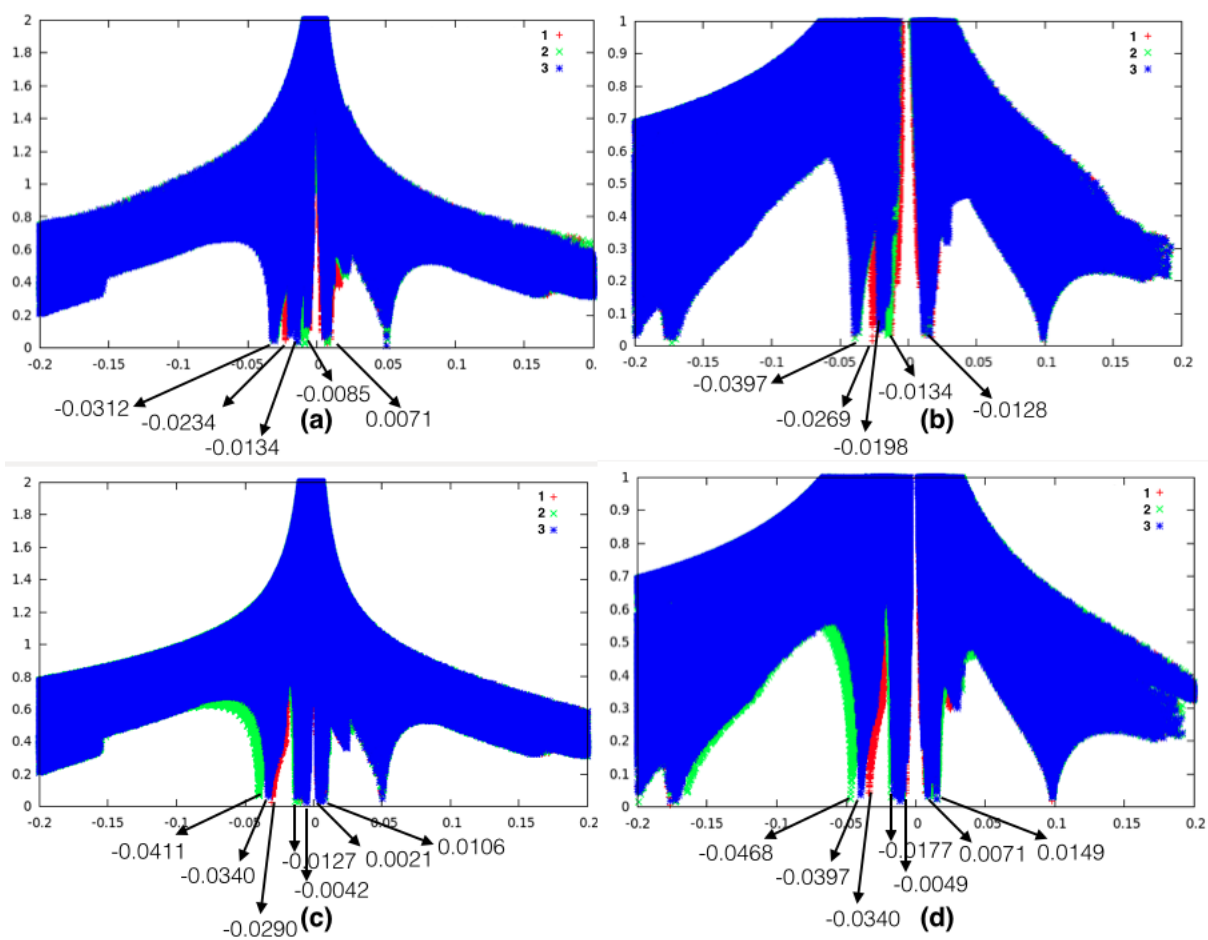

Figure 2: 2D plot of  $\text{sign}(\lambda_2)\rho$  for the different H<sub>2</sub>O([MIM][Cl]) ((a) and (b)) and CO<sub>2</sub>([MIM][Cl]) ((c) and (d)) isomers using wave function ((a) and (c)) and promolecular ((b) and (d)) densities for the NCI analysis.  $\text{sign}(\lambda_2)\rho$  values are noted for the peaks of interest, in order to facilitate the comparison between pro molecular and wave function density analyses.



## Additional radial distribution functions (RDFs) for the Sol- [MIM][Cl]<sub>18</sub> systems

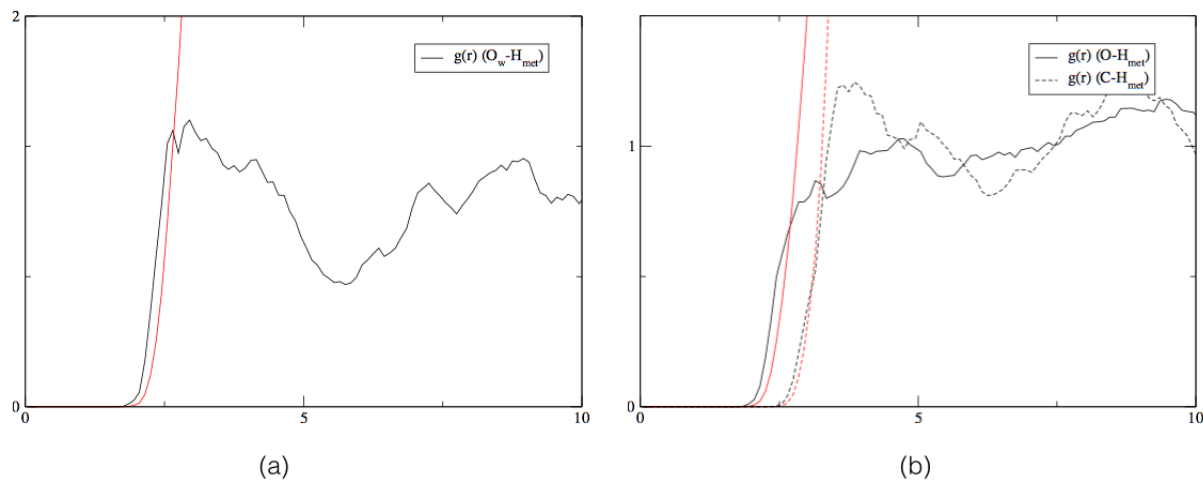

Figure 3: (a)  $\text{O}_w\text{-H}_{met}$  RDFs (black line) and the corresponding integral (red line) in the  $\text{H}_2\text{O}$ -[MIM][Cl]<sub>18</sub> system. (b)  $\text{O-H}_{met}$  (solid line) and  $\text{C-H}_{met}$  (dashed line) RDFs (black lines) and the corresponding integral (red lines) in the  $\text{CO}_2$ -[MIM][Cl]<sub>18</sub> system. The distance between the atoms ( $x$  axis) is in Å.

## Affinity energies Sol-[MIM][Cl]<sub>18</sub> systems

Table 5: Affinity ( $\Delta E$ ) and dispersion ( $\Delta E_{disp}$ ) energies of Sol-([MIM][Cl])<sub>18</sub> systems, at BLYP-D(SMD)/TZVP theory level, in kcal/mol.

|    | H <sub>2</sub> O |                   | CO <sub>2</sub> |                   |
|----|------------------|-------------------|-----------------|-------------------|
|    | $\Delta E$       | $\Delta E_{disp}$ | $\Delta E$      | $\Delta E_{disp}$ |
| 1  | -8.4             | -8.9              | -7.6            | -10.0             |
| 2  | -10.7            | -7.1              | -3.5            | -10.6             |
| 3  | -13.3            | -7.3              | -4.6            | -11.4             |
| 4  | -16.3            | -7.8              | -7.3            | -12.4             |
| 5  | -9.5             | -2.8              | -5.3            | -9.9              |
| 6  | -14.7            | -8.3              | -6.5            | -9.8              |
| 7  | -12.3            | -9.0              | -10.0           | -11.5             |
| 8  | -14.7            | -12.0             | -6.3            | -11.3             |
| 9  | -14.5            | -7.0              | -7.6            | -11.0             |
| 10 | -11.9            | -9.9              | -10.0           | -14.0             |
| 11 | -12.8            | -8.5              | -6.3            | -9.1              |
| 12 | -12.2            | -8.3              | -5.6            | -11.2             |
| 13 | -10.6            | -6.7              | -8.3            | -10.8             |
| 14 | -12.7            | -8.2              | -7.1            | -9.7              |

## SMD input example for the IL phase

```
%mem=7520mb
%nprocshared=8
%chk=cmimcl.chk
#m06/TZVP gfinput opt freq scrf=(smd,solvent=generic)
```

DBAphenyl F Scan

0 1

C -1.890058 -1.487067 1.527614

N -2.164846 -0.274264 2.115251

C -1.106831 0.107610 2.817863

C -0.153261 -0.808607 2.683183

N -0.630339 -1.823034 1.884513  
C -3.463567 0.376668 2.147877  
H 0.723397 -0.816752 3.164228  
O -2.686067 -1.906209 4.615484  
C -5.330680 -2.487563 4.340238  
O -5.478797 -2.720272 5.463685  
O -5.255630 -2.325065 3.199574  
O -5.282950 0.198427 4.934652  
C -3.288660 -2.878548 7.594465  
N -2.123154 -3.486075 7.411071  
C -1.123175 -2.545779 7.506811  
C -1.716970 -1.358180 7.770215  
N -3.072379 -1.590266 7.826709  
C -1.937545 -4.891401 7.027998  
C -2.875411 -5.305265 5.915297  
C -2.482479 -6.654613 5.343929  
C -3.386570 -7.065145 4.199659  
C -4.103163 -0.578357 8.009476  
Cl -2.361963 1.202032 5.592618  
Cl 0.015820 -3.689615 4.602305  
H -2.466140 -1.022841 4.959557  
H -1.851693 -2.417364 4.595078  
H -2.634798 -2.016994 0.959060  
C 0.139454 -3.018619 1.657368  
H -1.092792 0.966283 3.476957  
H -4.194075 -0.318518 2.561982  
H -3.398943 1.238304 2.811451  
C -3.844708 0.791307 0.811724  
H -1.319407 -0.358947 7.840217

H -0.099103 -2.800803 7.284843  
H -4.306751 -0.434984 9.071196  
H -5.002467 -0.895399 7.482191  
H -3.745206 0.347154 7.551659  
H -4.258034 -3.341689 7.524364  
H -0.910002 -4.961511 6.663789  
H -2.054627 -5.516980 7.918345  
H -3.915599 -5.335544 6.266901  
H -2.819710 -4.548463 5.125647  
H -1.446089 -6.586823 4.994305  
H -3.100792 -8.032686 3.782940  
H -4.430056 -7.136489 4.521468  
H -3.339630 -6.328896 3.392436  
H -2.501060 -7.416603 6.133611  
H -4.399400 0.570682 5.132802  
H -5.877232 0.949299 4.968225  
C -5.141250 1.438869 0.858003  
H -3.104236 1.488832 0.423031  
H -3.897681 -0.081151 0.162161  
C -5.522390 1.853508 -0.478151  
H -5.881721 0.741344 1.246695  
H -5.088276 2.311328 1.507565  
H -6.496138 2.339850 -0.443393  
H -4.781919 2.551033 -0.866843  
H -5.575364 0.981050 -1.127713  
H -0.415083 -3.688300 1.001671  
H 1.087785 -2.756546 1.190563  
H 0.327815 -3.515173 2.608092

eps=11.5 epsinf=2.0449 HBondAcidity=0.229 HBondBasicity=0.265  
SurfaceTensionAtInterface=61.24 CarbonAromaticity=0.375  
ElectronegativeHalogenicity=0.125

## References

- (1) Berendsen, H.; van der Spoel, D.; van Drunen, R. *Comput. Phys. Commun.* **1995**, *91*, 43–56.
- (2) Lindahl, E.; Hess, B.; van der Spoel, D. *Molecular modeling annual* **2001**, *7*, 306–317.
- (3) Van Der Spoel, D.; Lindahl, E.; Hess, B.; Groenhof, G.; Mark, A. E.; Berendsen, H. J. C. *J. Comput. Chem.* **2005**, *26*, 1701–1718.
- (4) Hess, B.; Kutzner, C.; van der Spoel, D.; Lindahl, E. *J. Chem. Theory Comput.* **2008**, *4*, 435–447.
- (5) Fannin, A. A.; Floreani, D. A.; King, L. A.; Landers, J. S.; Piersma, B. J.; Stech, D. J.; Vaughn, R. L.; Wilkes, J. S.; L., W. J. *J. Phys. Chem* **1984**, *88*, 2614–2621.
- (6) Car, R.; Parrinello, M. *Phys. Rev. Lett.* **1985**, *55*, 2471–2474.
- (7) CPMD, Copyright IBM Corp 1990-2006, Copyright MPI fur Festkorperforschung Stuttgart 1997-2001.
- (8) Grimme, S. *J. Comput. Chem.* **2006**, *16*, 1787.
- (9) Nose, S. *J. Chem. Phys.* **1984**, *81*, 511–519.
- (10) Nose, S. *Mol. Phys.* **1984**, *52*, 255–268.
- (11) Hoover, W. *Phys. Rev. A* **1985**, *31*, 1695–1697.
- (12) Johnson, E. R.; Keinan, S.; Mori-Sanchez, P.; Contreras-Garcia, J.; Cohen, A. J.; Yang, W. *J. Am. Chem. Soc.* **2010**, *132*, 6498–6506.
